# Supplementary material
Source: ML conference proceedings conference paper supplement (https://openaccess.thecvf.com/content/CVPR2026/html/Sheng_MCHDoc_A_Comprehensive_CVPR_2026_paper.html)
Supplement: Supplementary file 1 [file Sheng_MCHDoc_A_Comprehensive_CVPR_2026_supplemental.pdf]

# MCHDoc: A Comprehensive Benchmark for Reading Multi-Carrier Chinese Historical Documents

## Supplementary Material

001 In this Supplementary Material, we provide:

- 002 • The Details of MCHDoc
- 003 • Case Study
- 004 • An Exploratory Investigation into Knowledge-Based
- 005 LLM Post-Correction
- 006 • Limitation and Future Work

### 007 1. The Details of MCHDoc

#### 008 1.1. Explanations of six Carriers

009 **AncientBook.** AncientBook is primarily written or printed  
010 on hemp paper, which is made from processed plant fibers  
011 such as hemp, mulberry, or ramie. This type of paper is  
012 characterized by its strong and durable texture, good ink ab-  
013 sorbency, and resistance to decay. However, after centuries  
014 of preservation, many pages exhibit yellowing, ink bleed-  
015 ing, and surface degradation, which complicate character  
016 recognition and restoration.

017 **JianDu.** JianDu, also known as bamboo slips, was made  
018 from bamboo, which was used as writing materials before  
019 the widespread use of paper. The vertical arrangement of  
020 slips and the uneven surface of bamboo make the text seg-  
021 mented and difficult to align, leading to increased OCR dif-  
022 ficulty.

023 **Calligraphy.** Calligraphy works are often written on  
024 xuan paper. Xuan paper, also known as rice paper, is a  
025 high-quality handmade paper traditionally produced in Xu-  
026 ancheng, Anhui Province. It is made from a blend of Ptero-  
027 celtis tatarinowii bark and straw or other plant fibers. The  
028 paper is lightweight yet tough, featuring a smooth surface  
029 and excellent ink absorbency, which allows brush strokes to  
030 spread naturally and produce rich tonal variations.

031 **Inscription.** Inscription refers to characters carved on  
032 stone or metal surfaces, such as steles, tablets, or bronze  
033 vessels. The rigid and reflective materials produce strong  
034 lighting variations and shadows in captured images. Over  
035 centuries of exposure and rubbing, these carriers exhibit  
036 diverse types of degradation, including surface erosion,  
037 cracks, discoloration, and loss of carved depth. Such degra-  
038 dation results in blurred or partially missing characters,  
039 making recognition and restoration particularly challenging  
040 for vision-based models.

041 **Silk.** Silk was used for writing and painting before paper  
042 became widespread, particularly during the Warring States.  
043 The soft and glossy texture of silk provides a smooth writ-  
044 ing surface but tends to age poorly, resulting in cracks, dis-  
045 coloration, and partial loss of text. Moreover, the scripts

Table 1. Statistics of Different Carriers in MCHDoc

| Carrier     | Scale | Avg. Size | Avg. Character | Categories |
|-------------|-------|-----------|----------------|------------|
| AncientBook | 3,000 | 2327×2039 | 577            | 15249      |
| JianDu      | 3,000 | 278×1834  | 14             | 1671       |
| Calligraphy | 3192  | 1211×1647 | 38             | 4508       |
| Inscription | 5152  | 691×1594  | 15             | 4369       |
| Silk        | 881   | 114×162   | -              | 535        |
| Oracle Bone | 499   | 77×135    | -              | 100        |

on silk, such as early clerical or proto-regular styles, differ  
markedly from the standardized characters used after the  
Han dynasty.

**Oracle Bone.** Oracle Bone is the earliest known carrier of  
Chinese writing, carved on tortoise shells or animal bones  
during the Shang dynasty. The ancient script forms on or-  
acle bones are drastically different from the later clerical  
and regular scripts standardized after the Han dynasty, with  
complex pictographic structures and many extinct glyphs.

#### 1.2. Long-tail Distribution of Four Carriers

In this section, we observe that all four page-level carri-  
ers exhibit a clear long-tail distribution, as illustrated in  
Fig. 1. This observation could guide future efforts to im-  
prove recognition performance on rare categories.

#### 1.3. MCHDoc Trainset

In this paper, we introduce a dual-granularity dataset specifi-  
cally designed for training small-parameter multimodal  
models. We hypothesize that training data incorporating  
both broad global context (page-level) and fine-grained lo-  
cal features (character-level) can effectively compensate for  
the performance degradation often associated with limited  
model capacity. The dataset is composed of two main parts:  
(1) **Page-level Data:** it contains 10,000 full document im-  
ages across four carriers. This part is utilized for training the  
model’s page-level recognition. (2) **Character-level Data:**  
it contains 6,134 character-level images across six carriers.  
This collection was curated to train the model’s character-  
level recognition.

#### 1.4. Benchmark Version

The experimental results of Calligraphy reported in the  
main paper are based on an earlier release of CalliBench  
(released on June 25th).

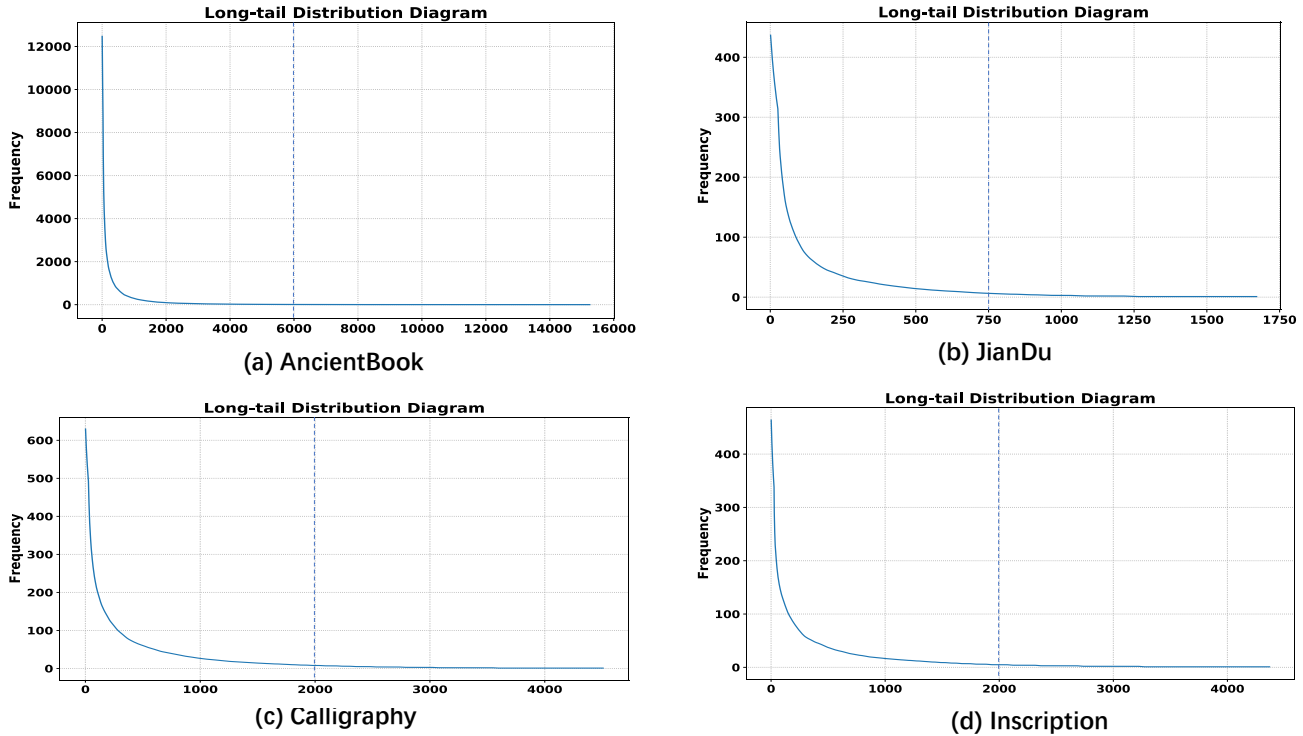

Figure 1. Long-tail Distribution of four Page-level Carriers in MCHDoc (The portion to the right of the blue dashed line corresponds to categories whose occurrence frequency is fewer than five times)

## 078 2. Case Study

079 After extensive evaluations, we observe that the overall per-  
 080 formance of existing models still falls short of handling the  
 081 diverse challenges present in our benchmark. To shed light  
 082 on these limitations, this section presents a detailed anal-  
 083 ysis of representative failure cases, which helps reveal the  
 084 underlying error patterns and provides actionable directions  
 085 for future research.

086 For the recognition task, we select representative failure  
 087 cases from two perspectives. For the page-level setting, we  
 088 focus on images whose 1-NED falls below 10%. For the  
 089 character-level setting, we examine samples with an accu-  
 090 racy of 0. All examples are drawn from the best-performing  
 091 four models in each category, ensuring that the analyzed er-  
 092 rors reflect intrinsic challenges rather than deficiencies of  
 093 weaker systems.

### 094 2.1. Effect of Hard Font Style on Recognition Ac- 095 curacy

096 Through the analysis of these failure cases, we further sum-  
 097 marize several categories of inherently difficult script styles,  
 098 including Oracle Bone Script, Seal Script, Semi-cursive  
 099 Script (Xing Shu), and Cursive Script (Cao Shu). These  
 100 scripts consistently exhibit significantly lower recognition  
 101 accuracy across models (Fig. 2).

The difficulty largely stems from their high visual com- 102  
 plexity, such as irregular glyph structures, large intra-class 103  
 variability, and strong stylistic deformations. In Oracle 104  
 Bone Script, the pictographic obscures the correspondence 105  
 between glyphs and their modern forms. Seal Script in- 106  
 troduces dense, rounded, and often symmetric patterns that 107  
 many models mistake for visually similar characters. Semi- 108  
 cursive and cursive scripts further challenge the system due 109  
 to stroke merging, ligatures, unstable writing speed, and 110  
 personalized handwriting styles, which dramatically reduce 111  
 the clarity of character boundaries. 112

Together, these factors make the four script styles par- 113  
 ticularly error-prone, revealing not only the limitations of 114  
 current models but also the necessity of designing recogni- 115  
 tion systems that are more robust to structural variability, 116  
 historical script diversity, and extreme stroke deformation. 117

### 118 2.2. Degradation Artifacts Impair Recognition Per- 119 formance

Beyond script complexity, we further identify several forms 120  
 of document degradations that substantially impair recogni- 121  
 tion quality (Fig. 3). 122

**Blurred Text** often appears in low-resolution scans or due 123  
 to ink diffusion on aged paper. Such blurring erases fine 124  
 stroke boundaries and prevents the model from capturing 125  
 subtle radical-level distinctions, resulting in frequent mis- 126

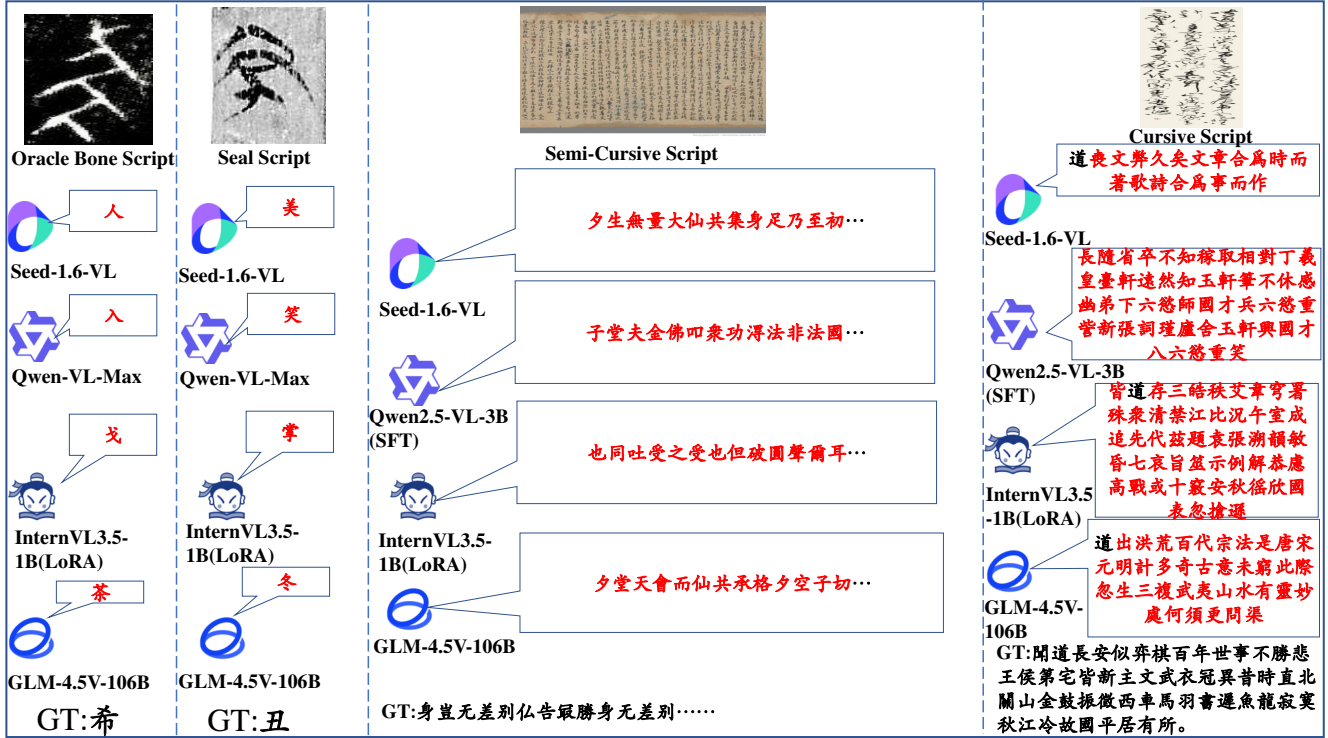

Figure 2. Effect of Hard Font Style on Recognition Accuracy (Red: wrong characters)

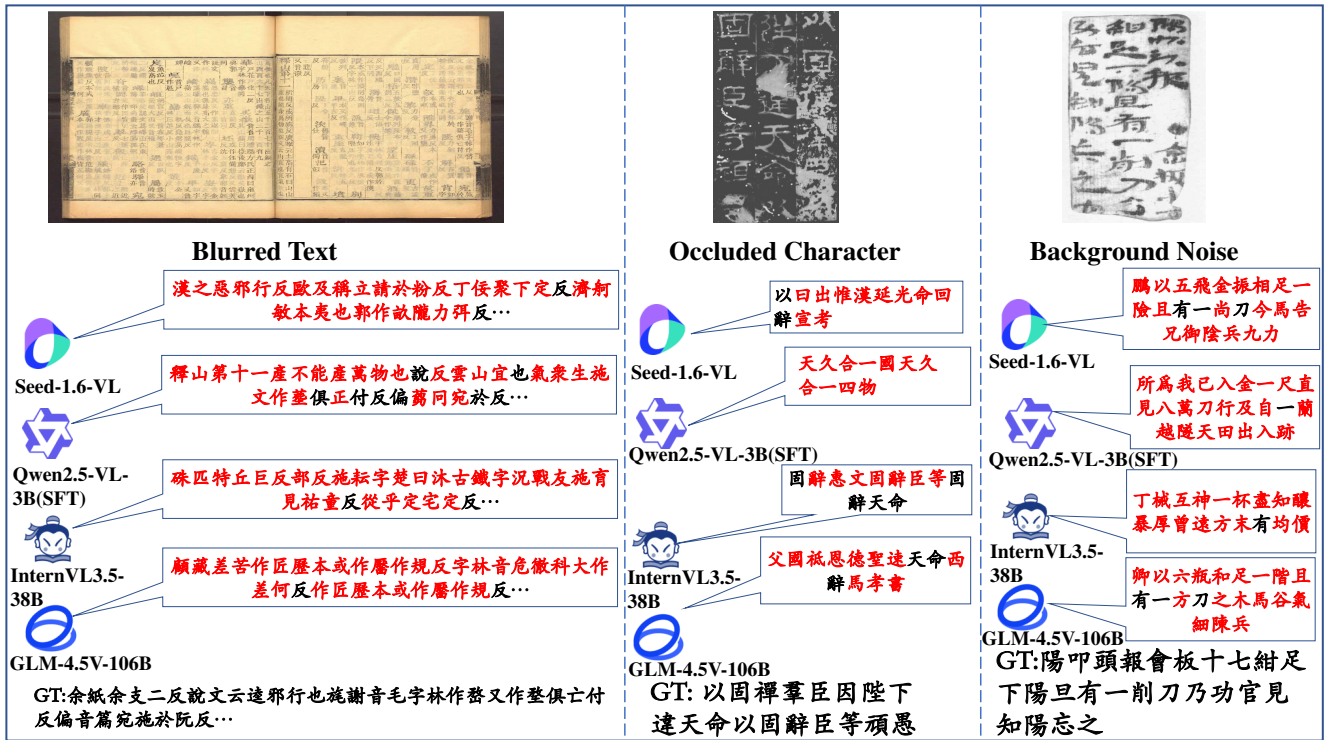

Figure 3. Degradation Artifacts Impair Recognition Performance (Red: wrong characters)

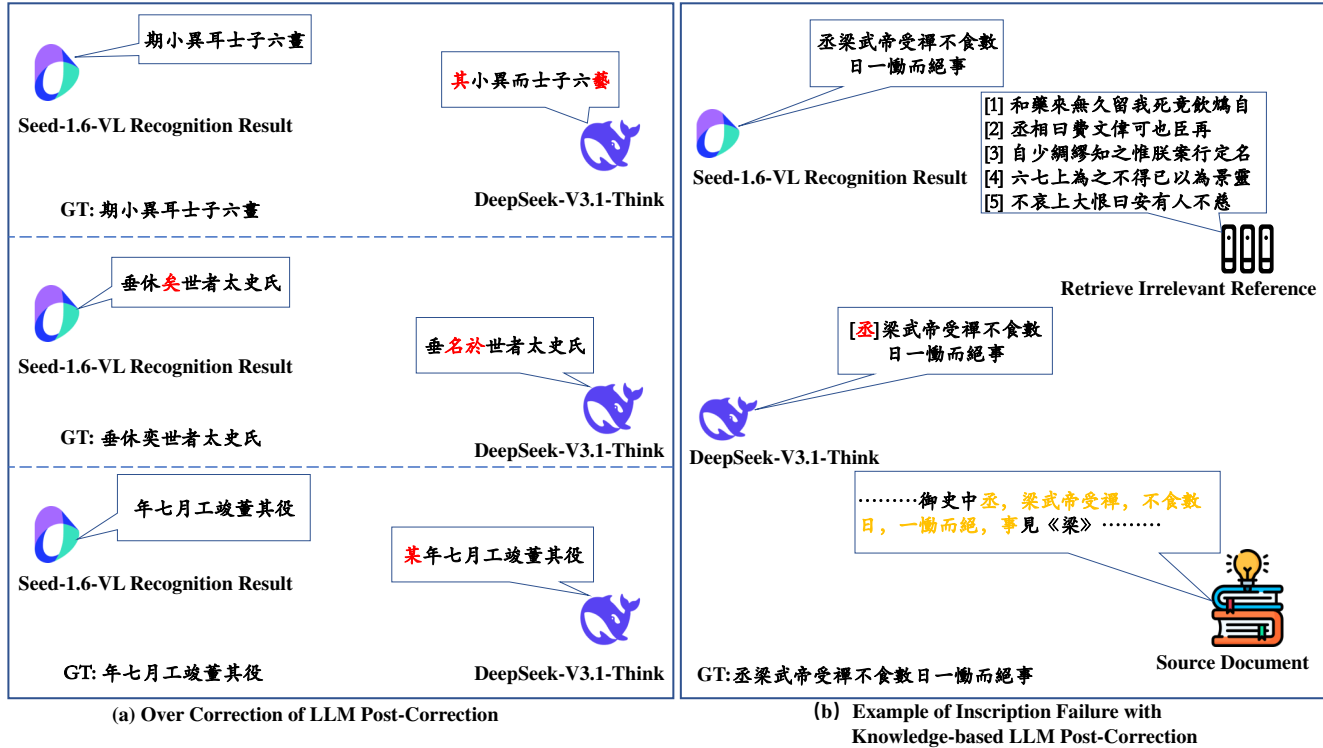

Figure 4. Case of Post-Correction Task (Red: wrong characters, Yellow: the position of the fragment in the original document)

127 recognition among visually similar characters.

128 **Occluded Characters**, particularly common in Inscription, 152  
 129 arise from surface erosion, rubbing artifacts, and mottled 153  
 130 damage accumulated over centuries. These occlusions may 154  
 131 remove essential stroke segments or distort the overall glyph 155  
 132 shape. When critical radicals are partially missing, the 156  
 133 model is unable to reconstruct the intended character. 157

134 **Background Noise** mainly refers to irregular white-noise 158  
 135 patterns, uneven fiber structures, and scanning artifacts, 159  
 136 which overlay the true character strokes. These high- 160  
 137 frequency noise components interfere with feature extrac- 161  
 138 tion and make the characters appear faint, patchy, and 162  
 139 structurally incomplete. As a result, recognition models 163  
 140 frequently fail to distinguish genuine strokes from noise- 164  
 141 induced patterns, leading to substantial drops in character- 165  
 142 level accuracy. 166

### 143 2.3. Over-Correction Phenomena in LLM Post- 167 144 Correction 168

145 In our study, we observed a recurring issue in LLM-based 169  
 146 post-correction(Fig. 4(a)): the model occasionally alters 170  
 147 text that was originally correct, a phenomenon we refer to as 171  
 148 over-correction. This occurs when the model, in its attempt 172  
 149 to improve or normalize the output, misinterprets correctly 173  
 150 recognized characters or words as erroneous. As a result, 174  
 151 the post-corrected output may introduce new errors, reduc- 175  
 176

ing overall accuracy despite the intention to improve it. 152

153 A primary cause of over-correction is the limited seman- 154  
 155 tic information in OCR outputs. When an LLM attempts 156  
 157 post-correction under these conditions, it often lacks suffi- 158  
 159 cient context to reliably distinguish correct from incorrect 159  
 characters. Consequently, the model relies heavily on its 160  
 own learned priors and guesses, which can lead to unneces- 161  
 sary or incorrect modifications. 162

### 163 2.4. External Knowledge Leads to Greater Correc- 164 165 tion Errors in Inscription 166

167 Inscriptions are typically partial reproductions of large ste- 168  
 169 les, meaning that each document contains only a small frac- 169  
 170 tion of the text. When using an external knowledge base 170  
 171 to assist LLM post-correction, this partiality poses a signif- 171  
 172 icant challenge. Queries based on these limited text seg- 172  
 173 ments often retrieve references that are irrelevant to the 173  
 174 local context of the inscription. Consequently, when the 174  
 175 model attempts to leverage these unrelated references for 175  
 176 correction, it may introduce additional errors rather than 176  
 improving accuracy, as shown in Fig. 4(b). This issue il- 177  
 lustrates a critical limitation of knowledge-augmented post- 178  
 correction for inscriptions: the misalignment between the 179  
 local textual fragment and the global knowledge base can 180  
 amplify over-correction phenomena. The model’s tendency 181  
 to rely on plausibility cues from irrelevant references can 182

Table 2. Average Recognition Accuracy (%) on Page-level Benchmark. The **Red** and **Blue** denote the optimal and sub-optimal results, respectively.

| Models                     | Version    | AVG          |              |              |
|----------------------------|------------|--------------|--------------|--------------|
|                            |            | AR           | CR           | 1-NED        |
| <i>Closed-Source MLLMs</i> |            |              |              |              |
| GPT-4o [7]                 | 2025-03-26 | 13.95        | 18.31        | 13.09        |
| GPT-5 [7]                  | 2025-08-07 | 24.97        | 26.48        | 24.84        |
| Doubao-Seed-1.6-VL [5]     | 2025-07-15 | <b>47.56</b> | <b>52.30</b> | <b>47.76</b> |
| Gemini-2.5-Pro [3]         | 2025-06-05 | 36.56        | 42.43        | 36.41        |
| Qwen-VL-Max [9]            | 2025-04-08 | 34.09        | 40.19        | 34.12        |
| <i>Open-Source MLLMs</i>   |            |              |              |              |
| MiniCPM-V-4.5-8B [14]      | 2025-08-27 | 18.31        | 20.26        | 17.62        |
| GLM-4.1V-10B [11]          | 2025-07-02 | 32.12        | 42.94        | 30.85        |
| GLM-4.5V-106B [11]         | 2025-08-11 | 41.29        | 45.63        | 41.13        |
| Qwen2.5-VL-3B [2]          | 2025-01-28 | 30.19        | 32.35        | 29.68        |
| Qwen2.5-VL-7B [2]          | 2025-01-28 | 27.20        | 31.63        | 28.39        |
| Qwen2.5-VL-32B [2]         | 2025-01-28 | 24.84        | 31.88        | 24.64        |
| Qwen2.5-VL-72B [2]         | 2025-01-28 | 40.43        | 45.21        | 40.25        |
| InternVL3.5-1B [12]        | 2025-08-25 | 25.09        | 30.45        | 24.97        |
| InternVL3.5-4B [12]        | 2025-08-25 | 29.98        | 32.98        | 29.59        |
| InternVL3.5-8B [12]        | 2025-08-25 | 31.40        | 35.08        | 30.75        |
| InternVL3.5-38B [12]       | 2025-08-25 | 39.82        | 43.18        | 39.76        |
| InternVL3-78B [15]         | 2025-04-11 | 24.93        | 28.86        | 25.30        |
| <i>Fine-tuned MLLMs</i>    |            |              |              |              |
| Qwen2.5-VL-3B(SFT) [9]     | 2025-01-28 | <b>43.67</b> | <b>46.79</b> | <b>43.08</b> |

177 lead to modifications that compromise the fidelity of the  
 178 original text, particularly in cases involving rare characters,  
 179 archaic expressions, or domain-specific terminology. Fur-  
 180 thermore, this phenomenon highlights a fundamental ten-  
 181 sion in knowledge-augmented correction: while external  
 182 knowledge can provide valuable contextual signals, its in-  
 183 discriminate application may undermine performance when  
 184 the input is only a small excerpt of a larger document.

### 185 3. Experimental Results

186 The overall performance of page-level and character-level  
 187 post-correction, with and without the knowledge base, is  
 188 reported in Tabs. 2–5. In addition, the page-level and  
 189 character-level results of Qwen3-VL are provided in Tab. 6  
 190 and Tab. 7.

### 191 4. An Exploratory Investigation into 192 Knowledge-Based LLM Post-Correction

193 This section examines the effect of knowledge base size  
 194 and text segmentation strategy on post-correction out-  
 195 comes. Understanding these influences not only sheds light on the  
 196 factors that determine correction effectiveness but also pro-  
 197 vides guidance for designing future systems that can bet-  
 198 ter leverage external knowledge and handle diverse text  
 199 structures. we employ the text2vec-base-Chinese [8] model  
 200 for embedding and the bge-reranker-base [13] model for  
 201 reranking, enabling us to assess the effects of both knowl-

Table 3. Average Recognition Accuracy (%) on Character-level Benchmark. The **Red** and **Blue** denote the optimal and sub-optimal results, respectively.

| Models                     | Version    | AVG. ACC    |
|----------------------------|------------|-------------|
| <i>Closed-Source MLLMs</i> |            |             |
| Qwen-VL-Max [9]            | 2025-04-08 | <b>28.8</b> |
| Gemini-2.5-Pro [3]         | 2025-06-05 | 18.9        |
| GPT-4o [7]                 | 2025-03-26 | 13.5        |
| GPT-5 [7]                  | 2025-08-07 | 14.0        |
| Doubao-Seed-1.6-VL [5]     | 2025-07-15 | 23.3        |
| <i>Open-Source MLLMs</i>   |            |             |
| GLM-4.1V-10B [11]          | 2025-07-02 | 22.6        |
| GLM-4.5V-106B [11]         | 2025-08-11 | 25.3        |
| Qwen2.5-VL-3B [2]          | 2025-01-28 | 18.6        |
| Qwen2.5-VL-7B [2]          | 2025-01-28 | 23.2        |
| Qwen2.5-VL-32B [2]         | 2025-01-28 | 15.8        |
| Qwen2.5-VL-72B [2]         | 2025-01-28 | 19.4        |
| InternVL3.5-1B [12]        | 2025-08-25 | 5.9         |
| InternVL3.5-4B [12]        | 2025-08-25 | 5.3         |
| InternVL3.5-8B [12]        | 2025-08-25 | 6.3         |
| InternVL3.5-38B [12]       | 2025-08-25 | 19.3        |
| MiniCPM-V-4.5-8B [12]      | 2025-08-27 | 21.6        |
| <i>Fine-tuned MLLMs</i>    |            |             |
| InternVL3.5-1B(LoRA) [12]  | 2025-08-25 | <b>25.4</b> |

Table 4. LLM Post-Correction Average Performance based on Recognition results of Doubao-Seed-1.6-VL [5]. The **Red** and **Blue** denote the optimal and sub-optimal results, respectively.

| Models                       | Version    | AVG          |              |              |
|------------------------------|------------|--------------|--------------|--------------|
|                              |            | AR           | CR           | 1-NED        |
| <i>Closed-Source LLMs</i>    |            |              |              |              |
| Gemini-2.5-Pro [3]           | 2025-06-05 | 37.75        | 41.90        | 37.16        |
| Qwen2.5-Max [9]              | 2025-03-31 | 43.68        | <b>51.16</b> | 44.43        |
| Doubao-Seed-1.6 [5]          | 2025-07-15 | 41.05        | 45.75        | 40.77        |
| Kimi-K2 [10]                 | 2025-07-11 | <b>44.80</b> | 49.66        | 44.59        |
| GPT-4o [7]                   | 2025-03-26 | 44.44        | 49.13        | 44.43        |
| GPT-5 [7]                    | 2025-08-07 | 40.28        | 44.04        | 39.80        |
| Gemini-2.5-Flash [3]         | 2025-06-17 | 43.68        | 48.45        | 43.52        |
| Gemini-2.5-Flash-Think [3]   | 2025-06-17 | 42.47        | 46.93        | 42.06        |
| <i>Open-Source LLMs</i>      |            |              |              |              |
| Deepseek-V3-671B [4]         | 2025-03-24 | <b>46.21</b> | <b>51.20</b> | <b>46.62</b> |
| Deepseek-V3.1-671B [4]       | 2025-08-21 | 44.58        | 49.06        | 44.63        |
| Deepseek-V3.1-Think-671B [4] | 2025-08-21 | 44.58        | 49.06        | <b>44.63</b> |
| Deepseek-R1-671B [6]         | 2025-05-28 | 41.23        | 44.96        | 40.78        |

edge retrieval and ranking strategies on post-correction out-  
 comes. The whole result can be seen from Tab. 8 and Tab.  
 9.

#### 205 4.1. Setting

**Chunk Strategy1.** Specifically, documents shorter than  
 1,000 characters are kept intact with no overlap; documents  
 between 1,000 and 5,000 characters are chunked with a

Table 5. Knowledge-based LLM Post-Correction Average Performance based on Recognition results of Doubao-Seed-1.6-VL [5]. The **Red** and **Blue** denote the optimal and sub-optimal results, respectively.

| Models                         | Version    | AVG          |              |              |
|--------------------------------|------------|--------------|--------------|--------------|
|                                |            | AR           | CR           | 1-NED        |
| <i>Closed-Source LLMs</i>      |            |              |              |              |
| Kimi-K2 [10]                   | 2025-07-11 | 45.44        | 50.03        | 45.26        |
| Qwen2.5-Max [9]                | 2025-01-29 | 39.64        | 44.20        | 39.16        |
| Gemini-2.5-Pro [3]             | 2025-06-05 | 40.64        | 42.93        | 39.89        |
| Gemini-2.5-Flash [3]           | 2025-06-17 | 46.25        | <b>51.69</b> | 46.34        |
| Gemini-2.5-Flash-Think [3]     | 2025-06-17 | <b>47.10</b> | 50.55        | <b>46.55</b> |
| Gemini-2.5-Flash(Reranker) [3] | 2025-06-17 | 46.36        | 51.82        | 46.45        |
| <i>Open-Source LLMs</i>        |            |              |              |              |
| Deepseek-V3-671B [4]           | 2025-03-24 | 46.64        | 50.10        | 46.27        |
| Deepseek-V3.1-671B [4]         | 2025-08-21 | 42.40        | 45.81        | 42.00        |
| Deepseek-V3.1-Think-671B [4]   | 2025-08-21 | <b>48.67</b> | <b>51.03</b> | <b>48.05</b> |
| Deepseek-R1-617B [6]           | 2025-05-28 | 43.22        | 46.76        | 42.44        |

Table 6. The Performance of Qwen3-VL Series on Page-level Recognition Accuracy(%).

| Models            | AncientBook  |              |              | JianDu       |              |              | Calligraphy  |              |              | Inscription  |              |              |
|-------------------|--------------|--------------|--------------|--------------|--------------|--------------|--------------|--------------|--------------|--------------|--------------|--------------|
|                   | AR           | CR           | 1-NED        |
| Qwen3-VL-2B [1]   | 30.67        | 34.31        | 30.96        | 17.53        | 19.40        | 17.15        | 54.49        | 57.73        | 53.79        | 68.62        | 70.40        | 68.12        |
| Qwen3-VL-4B [1]   | 38.07        | 42.90        | 38.40        | 20.49        | 22.19        | 19.98        | 54.84        | 60.20        | 53.69        | 70.83        | 72.34        | 70.61        |
| Qwen3-VL-8B [1]   | 56.00        | 66.02        | 57.72        | <b>26.84</b> | <b>29.38</b> | <b>26.34</b> | <b>61.06</b> | <b>65.55</b> | <b>60.62</b> | <b>77.70</b> | <b>79.09</b> | <b>77.46</b> |
| Qwen3-VL-32B [1]  | <b>62.30</b> | <b>72.80</b> | <b>63.80</b> | 21.25        | 23.62        | 20.51        | 56.58        | 64.90        | 56.04        | 75.18        | 77.06        | 75.07        |
| Qwen3-VL-Plus [1] | <b>61.40</b> | <b>70.75</b> | <b>62.58</b> | <b>26.72</b> | <b>28.88</b> | <b>26.13</b> | <b>64.81</b> | <b>69.14</b> | <b>64.15</b> | <b>78.97</b> | <b>80.32</b> | <b>78.83</b> |

Table 7. The Performance of Qwen3-VL Series on Character-level Recognition Accuracy(%). The **Red** and **Blue** denote the optimal and sub-optimal results, respectively.

| Models            | ACC (%)     |             |             |             |            |            |
|-------------------|-------------|-------------|-------------|-------------|------------|------------|
|                   | Anc.        | Jian.       | Calli.      | Ins.        | Silk       | Oracle.    |
| Qwen3-VL-2B [1]   | 65.4        | 11.2        | 44.6        | <b>25.2</b> | 4.9        | 2.4        |
| Qwen3-VL-4B [1]   | 68.8        | 13.2        | 44.0        | 21.2        | 4.4        | 3.2        |
| Qwen3-VL-8B [1]   | <b>72.2</b> | <b>17.0</b> | <b>57.0</b> | <b>29.2</b> | <b>5.0</b> | 4.0        |
| Qwen3-VL-32B [1]  | 66.8        | 14.2        | 46.6        | 18.0        | 4.0        | <b>4.8</b> |
| Qwen3-VL-Plus [1] | <b>73.8</b> | <b>16.2</b> | <b>49.4</b> | 22.8        | <b>6.4</b> | <b>4.4</b> |

209 1,000-character window and a 200-character overlap; texts  
 210 between 5,000 and 10,000 characters are segmented with a  
 211 2,000-character window and a 400-character overlap; and  
 212 texts exceeding 10,000 characters are divided into 4,000-  
 213 character segments with a 600-character overlap. Introducing  
 214 progressively larger overlaps for longer texts helps preserve  
 215 cross-boundary context and reduces information loss, while  
 216 keeping shorter documents whole preserves their full context  
 217 and avoids unnecessary fragmentation. This hierarchical,  
 218 overlap-aware design stabilizes embedding quality, improves  
 219 semantic coherence across segments, and enhances retrieval  
 220 performance in downstream knowledge-base construction and  
 221 RAG tasks.

222 **Chunk Strategy2.** Specifically, documents shorter than  
 223 1,000 characters are kept intact with no overlap; documents  
 224 between 1,000 and 5,000 characters are chunked with a  
 225 600-character window and an 80-character overlap; texts

between 5,000 and 10,000 characters are segmented with  
 an 800-character window and a 120-character overlap; and  
 texts exceeding 10,000 characters are divided into 1,000-  
 character segments with a 200-character overlap.

**Raw Knowledge Base:** a large knowledge base with 1.7  
 billion characters constructed from heterogeneous historical  
 texts.

**MCHDoc Knowledge Base:** a compact knowledge base  
 constructed from the reference text segments corresponding  
 to the evaluation corpus.

## 4.2. Findings

**Impact of Knowledge Base Size on Correction Performance.**  
 We observe that the size and composition of the external  
 knowledge base substantially influence the final post-correction  
 performance. Despite the much smaller scale of MCHDoc  
 knowledge base, the curated knowledge base yields significantly  
 larger correction gains. This suggests that relevance and  
 precision of retrieved evidence play a more crucial role than  
 sheer knowledge base size. A large but noisy corpus tends  
 to introduce distractive or weakly related references, whereas  
 a highly targeted knowledge base provides clean and authoritative  
 signals that better guide the correction of OCR outputs. As  
 shown in Tab. 8, On AncientBook, the MCHDoc knowledge  
 base yields an average improvement of 4 percentage points in  
 post-correction accuracy. On Calligraphy, the gain is even  
 more pronounced, reaching 8 percentage points on average.  
 Notably, for JianDu, using the smaller knowledge base not  
 only surpasses the performance obtained with the large corpus  
 but even exceeds the accuracy of the original OCR outputs,  
 indicating that highly relevant and noise-free references are  
 particularly beneficial for this carrier.

**Effect of Chunk Strategy on Correction Performance.**  
 We further compare two chunking strategies and find that  
 using larger chunks with greater overlap leads to more  
 effective retrieval and larger gains in post-correction  
 performance (Tab. 8 and Tab. 9). Larger and more  
 redundant chunks preserve broader contextual information,  
 which helps the retriever return evidence that is semantically  
 closer to the query. This enriched contextual alignment  
 provides stronger guidance for the correction model,  
 resulting in more accurate revisions of OCR outputs.

Under the MCHDoc-sized knowledge base, however, the  
 difference between the two chunking strategies remains  
 relatively small. The moderate size and domain focus of  
 MCHDoc appear to provide sufficient contextual coverage  
 for retrieval, reducing the sensitivity to how the text is  
 segmented. The only notable exception is observed on the  
 JianDu carrier, where the first strategy—using larger and  
 more overlapping chunks—yields a clear improvement.

In contrast, when applied to the large raw knowledge  
 base, the impact of the chunking strategy becomes sub-

278 stantially more pronounced. The first strategy consis-  
279 tently outperforms the smaller-chunk alternative, as the pre-  
280 served contextual breadth helps counteract the noise and  
281 heterogeneity inherent in the large corpus. By maintain-  
282 ing more coherent semantic units, the retriever is better  
283 able to surface relevant evidence from the noisy back-  
284 ground, ultimately yielding stronger retrieval-augmented  
285 post-correction performance.

## 286 5. Limitation and Future Work

287 Although our benchmark provides a comprehensive evalua-  
288 tion across multiple carriers, achieving a universal frame-  
289 work for reading Chinese historical documents remains  
290 challenging. Additionally, due to copyright restrictions and  
291 the limited availability of source materials, the dataset cur-  
292 rently does not include page-level images of Oracle Bone  
293 and Silk.

294 Future research can strengthen knowledge-guided post-  
295 correction by exploring more advanced retrieval and  
296 knowledge integration mechanisms. First, a promis-  
297 ing direction is to adopt multi-hop retrieval with  
298 deepresearch, where the system recursively expands  
299 and verifies evidence rather than relying on a single  
300 round of retrieval. Secondly, beyond unstructured re-  
301 trieval, integrating structured knowledge sources, in-  
302 cluding classical Chinese knowledge graphs, hierarchi-  
303 cal lexical databases, and cross-edition textual align-  
304 ments, may provide more reliable semantic ground-  
305 ing.

## 306 References

- 307 [1] Shuai Bai, Yuxuan Cai, Ruizhe Chen, et al. Qwen3-v1 tech-  
308 nical report, 2025. 6
- 309 [2] Shuai Bai, Keqin Chen, Xuejing Liu, et al. Qwen2.5-v1 tech-  
310 nical report, 2025. 5
- 311 [3] Gheorghe Comanici, Eric Bieber, Mike Schaekermann, et al.  
312 Gemini 2.5: Pushing the frontier with advanced reasoning,  
313 multimodality, long context, and next generation agentic ca-  
314 pabilities, 2025. 5, 6
- 315 [4] DeepSeek-AI, Aixin Liu, Bei Feng, et al. Deepseek-v3 tech-  
316 nical report, 2025. 5, 6
- 317 [5] Dong Guo, Faming Wu, Feida Zhu, et al. Seed1.5-v1 techni-  
318 cal report, 2025. 5, 6, 8
- 319 [6] Daya Guo, Dejian Yang, Haowei Zhang, et al. Deepseek-r1  
320 incentivizes reasoning in llms through reinforcement learn-  
321 ing. *Nature*, 645(8081):633–638, 2025. 5, 6
- 322 [7] Aaron Hurst, Adam Lerer, Adam P. Goucher, et al. Gpt-4o  
323 system card, 2024. 5
- 324 [8] Xu Ming. text2vec: A tool for text to vector, 2022. 5
- 325 [9] An Yang Qwen, Baosong Yang, Beichen Zhang, et al.  
326 Qwen2.5 technical report, 2025. 5, 6
- 327 [10] Kimi Team, Yifan Bai, Yiping Bao, et al. Kimi k2: Open  
328 agentic intelligence, 2025. 5, 6

- [11] V Team, Wenyi Hong, Wenmeng Yu, et al. Glm-4.5v and  
glm-4.1v-thinking: Towards versatile multimodal reasoning  
with scalable reinforcement learning, 2025. 5 329  
330  
331
- [12] Weiyun Wang, Zhangwei Gao, Lixin Gu, et al. Internv13.5:  
Advancing open-source multimodal models in versatility,  
reasoning, and efficiency, 2025. 5 332  
333  
334
- [13] Shitao Xiao, Zheng Liu, Peitian Zhang, and Niklas Muen-  
nighoff. C-pack: Packaged resources to advance general chi-  
nese embedding, 2023. 5 335  
336  
337
- [14] Tianyu Yu, Zefan Wang, Chongyi Wang, et al. Minicpm-  
v 4.5: Cooking efficient mllms via architecture, data, and  
training recipe, 2025. 5 338  
339  
340
- [15] Jinguo Zhu, Weiyun Wang, Zhe Chen, et al. Internv13: Ex-  
ploring advanced training and test-time recipes for open-  
source multimodal models, 2025. 5 341  
342  
343

Table 8. Knowledge-based LLM Post-Correction Accuracy with Strategy 1 based on Recognition Results of Doubao-Seed-1.6-VL [5]. The **Red** and **Blue** denote the optimal and sub-optimal results, respectively. Values with **Green** borders denote better than recognition results.

| Models                       | AncientBook |       |       | JianDu |       |       | CalliGraphy |       |       | Inscription |       |       |
|------------------------------|-------------|-------|-------|--------|-------|-------|-------------|-------|-------|-------------|-------|-------|
|                              | AR          | CR    | 1-NED | AR     | CR    | 1-NED | AR          | CR    | 1-NED | AR          | CR    | 1-NED |
| <i>Raw knowledge base</i>    |             |       |       |        |       |       |             |       |       |             |       |       |
| Kimi-K2                      | 47.78       | 50.51 | 48.56 | 18.87  | 21.55 | 17.70 | 59.79       | 64.69 | 58.95 | 55.33       | 63.36 | 55.82 |
| Deepseek-V3.1-671B           | 56.93       | 61.57 | 58.57 | 16.40  | 19.54 | 15.16 | 56.51       | 61.63 | 55.40 | 39.77       | 40.52 | 38.88 |
| Deepseek-V3.1-Think-671B     | 61.33       | 62.85 | 61.95 | 18.95  | 21.36 | 17.91 | 73.40       | 75.46 | 72.92 | 41.00       | 44.47 | 39.40 |
| Qwen2.5-Max                  | 33.31       | 35.38 | 34.04 | 17.73  | 20.56 | 16.41 | 53.80       | 60.17 | 52.91 | 53.72       | 60.70 | 53.28 |
| Gemini-2.5-Pro               | 59.92       | 61.89 | 60.73 | 13.95  | 15.70 | 12.99 | 58.70       | 61.50 | 57.68 | 29.98       | 32.63 | 28.15 |
| Gemini-2.5-Flash             | 59.34       | 64.61 | 61.36 | 17.99  | 20.45 | 16.77 | 56.64       | 62.14 | 55.71 | 51.02       | 59.56 | 51.51 |
| Gemini-2.5-Flash(Reranker)   | 59.70       | 64.93 | 61.75 | 18.06  | 20.72 | 16.91 | 56.23       | 61.87 | 55.43 | 51.45       | 59.75 | 51.70 |
| Deepseek-V3-671B             | 58.35       | 61.48 | 59.33 | 17.54  | 19.70 | 16.38 | 63.95       | 67.03 | 63.12 | 46.73       | 52.19 | 46.26 |
| Deepseek-R1-671B             | 60.99       | 64.16 | 62.32 | 15.84  | 18.13 | 14.62 | 61.18       | 65.49 | 60.17 | 34.87       | 39.25 | 32.66 |
| Gemini-2.5-Flash-Think       | 64.11       | 68.05 | 65.64 | 17.21  | 19.22 | 15.87 | 63.02       | 66.50 | 62.16 | 44.07       | 48.42 | 42.51 |
| Qwen3-Max                    | 58.79       | 63.62 | 60.47 | 19.13  | 21.85 | 18.17 | 59.46       | 64.29 | 58.45 | 57.93       | 65.36 | 58.77 |
| <i>MCHDoc knowledge base</i> |             |       |       |        |       |       |             |       |       |             |       |       |
| Kimi-K2                      | 56.34       | 59.52 | 57.42 | 20.02  | 22.75 | 19.32 | 65.33       | 69.73 | 64.67 | 57.15       | 63.48 | 57.31 |
| Deepseek-V3.1-671B           | 58.71       | 63.10 | 60.21 | 18.58  | 21.69 | 17.50 | 63.13       | 67.54 | 62.43 | 41.15       | 48.02 | 40.42 |
| Deepseek-V3.1-think-671B     | 58.36       | 59.78 | 58.95 | 18.82  | 21.14 | 17.79 | 73.76       | 75.72 | 73.22 | 40.84       | 44.51 | 39.31 |
| Qwen2.5-Max                  | 34.08       | 36.07 | 34.82 | 18.61  | 21.78 | 17.40 | 58.20       | 64.30 | 57.52 | 53.16       | 60.02 | 52.82 |
| Gemini-2.5-Pro               | 63.95       | 66.01 | 64.87 | 17.56  | 19.69 | 16.66 | 68.55       | 70.98 | 67.85 | 30.83       | 33.27 | 29.31 |
| Gemini-2.5-Flash             | 60.91       | 65.82 | 62.87 | 18.77  | 21.20 | 17.66 | 61.52       | 66.53 | 60.79 | 52.49       | 59.33 | 52.70 |
| Gemini-2.5-Flash(Reranker)   | 60.87       | 65.77 | 62.73 | 18.85  | 21.34 | 17.99 | 61.04       | 66.31 | 60.46 | 52.98       | 59.54 | 53.01 |
| Deepseek-V3-671B             | 59.99       | 62.84 | 60.98 | 19.47  | 21.59 | 18.47 | 71.63       | 73.96 | 71.09 | 47.34       | 51.21 | 46.53 |
| Deepseek-R1-671B             | 63.70       | 66.59 | 65.03 | 18.83  | 21.39 | 17.80 | 70.19       | 73.59 | 69.59 | 36.67       | 40.30 | 34.64 |
| Gemini-2.5-Flash-Think       | 67.25       | 70.73 | 68.63 | 18.65  | 20.88 | 17.89 | 71.89       | 74.76 | 71.39 | 45.90       | 49.66 | 44.64 |
| Qwen3-Max                    | 60.24       | 64.68 | 61.88 | 19.96  | 22.54 | 19.04 | 63.31       | 67.95 | 62.50 | 58.64       | 64.88 | 59.18 |

Table 9. Knowledge-based LLM Post-Correction Accuracy with Strategy 2 based on Recognition Results of Doubao-Seed-1.6-VL [5]. The **Red** and **Blue** denote the optimal and sub-optimal results, respectively. Values with **Green** borders denote better than recognition results.

| Models                       | AncientBook |       |       | JianDu |       |       | CalliGraphy |       |       | Inscription |       |       |
|------------------------------|-------------|-------|-------|--------|-------|-------|-------------|-------|-------|-------------|-------|-------|
|                              | AR          | CR    | 1-NED | AR     | CR    | 1-NED | AR          | CR    | 1-NED | AR          | CR    | 1-NED |
| <i>Raw knowledge base</i>    |             |       |       |        |       |       |             |       |       |             |       |       |
| Kimi-K2                      | 52.28       | 56.00 | 53.44 | 17.46  | 20.12 | 16.34 | 50.81       | 57.48 | 49.77 | 57.07       | 63.89 | 57.25 |
| Deepseek-V3.1-Think-671B     | 54.13       | 56.57 | 54.81 | 15.08  | 17.97 | 13.79 | 47.99       | 54.73 | 46.76 | 44.74       | 55.66 | 45.28 |
| Qwen2.5-Max                  | 30.79       | 32.97 | 31.54 | 16.39  | 19.35 | 14.90 | 47.09       | 54.73 | 45.75 | 51.26       | 59.17 | 50.86 |
| Gemini-2.5-Pro               | 55.03       | 57.42 | 55.93 | 10.12  | 11.68 | 9.05  | 39.77       | 44.24 | 38.06 | 31.22       | 34.26 | 29.63 |
| Gemini-2.5-Flash             | 57.70       | 63.45 | 59.64 | 16.60  | 19.48 | 15.56 | 46.87       | 54.02 | 45.61 | 51.19       | 60.84 | 51.83 |
| Gemini-2.5-Flash(Reranker)   | 57.87       | 63.24 | 59.64 | 16.32  | 18.72 | 15.33 | 46.11       | 53.30 | 45.06 | 50.56       | 59.83 | 51.06 |
| <i>MCHDoc knowledge base</i> |             |       |       |        |       |       |             |       |       |             |       |       |
| Kimi-K2                      | 51.02       | 55.97 | 51.98 | 19.62  | 22.02 | 18.70 | 64.16       | 68.66 | 63.50 | 58.40       | 64.06 | 58.29 |
| Deepseek-V3.1-Think-671B     | 58.26       | 60.69 | 59.89 | 18.43  | 21.15 | 16.94 | 62.02       | 66.60 | 61.38 | 42.31       | 50.10 | 41.66 |
| Qwen2.5-Max                  | 32.69       | 34.60 | 33.37 | 14.35  | 16.50 | 13.37 | 57.91       | 63.87 | 56.97 | 25.23       | 28.89 | 25.21 |
| Gemini-2.5-Pro               | 64.53       | 66.94 | 65.57 | 17.27  | 19.25 | 16.46 | 66.16       | 68.98 | 65.47 | 31.57       | 34.05 | 29.98 |
| Gemini-2.5-Flash             | 61.46       | 66.40 | 63.37 | 18.64  | 21.09 | 17.62 | 60.00       | 65.41 | 59.39 | 52.13       | 59.64 | 52.43 |
| Gemini-2.5-Flash(Reranker)   | 61.10       | 66.14 | 62.95 | 18.83  | 21.33 | 17.90 | 61.04       | 66.16 | 60.43 | 52.91       | 59.49 | 53.06 |
